# Supplementary material
Source: HighWire-hosted journal article supplement (https://bmjopensem.bmj.com/content/4/1/e000322)
Supplement: inline-supplementary-material-3 [file inline-supplementary-material-3.docx]

**SUPPLEMANTARY TABLE S1** All results of the KINDL questionnaire and reference values of healthy children

|  | **IG _T1** | | **IG_T2** | | **KG_T2** | | **Reference values** | |
| --- | --- | --- | --- | --- | --- | --- | --- | --- |
|  | **mean** | **95%-CI** | **mean** | **95%-CI** | **mean** | **95%-CI** | **mean** | **95%-CI** |
| Total score | 74,3 | 69,5-79,2 | 81,5 | 77,6-85,5 | 71,8 | 66,5-77,0 | 76,9 | 76,7-77,1 |
| Subscales |  |  |  |  |  |  |  |  |
| Physical | 64,4 | 55,0-73,7 | 83,4 | 78,2-88,7 | 65,1 | 54,1-76,1 | 77,2 | 76,8-77,7 |
| Psychological | 78,4 | 72,2-84,7 | 83,0 | 77,9-88,1 | 74,3 | 65,3-83,3 | 80,9 | 80,7-81,2 |
| Self-esteem | 67,3 | 59,9-74,7 | 76,3 | 68,6-83,9 | 57,6 | 48,1-67,2 | 69,7 | 69,4-70,0 |
| Family | 89,5 | 85,0-94,0 | 90,9 | 86,5-95,3 | 81,7 | 71,9-91,5 | 78,3 | 78,0-78,6 |
| Friends | 74,9 | 67,1-82,7 | 77,2 | 71,1-83,3 | 78,7 | 73,0-84,4 | 78,0 | 77,8-78,3 |
| School | 71,5 | 60,7-82,2 | 77,6 | 70,0-85,1 | 66,7 | 54,2-79,1 | 77,0 | 76,6-77,3 |
